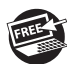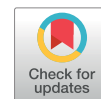

# Differences Between Randomized Clinical Trial Patients and Real-World Initiators of the Glucagon-Like Peptide 1 Receptor Agonist Liraglutide

*Diabetes Care* 2018;41:e133–e135 | <https://doi.org/10.2337/dc18-0999>

Jakob Schöllhammer Knudsen,<sup>1</sup>  
Reimar Wernich Thomsen,<sup>1</sup>  
Anton Pottegård,<sup>2</sup> Filip Krag Knop,<sup>3,4</sup>  
and Henrik Toft Sørensen<sup>1</sup>

Randomized controlled trials (RCTs) are considered the gold standard for determining efficacy and safety of new drugs. Successful randomization addresses known and unknown confounding when assessing a drug's effect among trial patients selected on strict inclusion and exclusion criteria (1). However, treatment results have been shown on occasion to be much less favorable than expected outside trial populations, often related to differences in age, comorbidity, disease severity, drug compliance, and/or comedication among patients treated in everyday clinical practice (1). The risk of adverse drug effects may also be higher among patients treated in routine clinical care.

Liraglutide, a glucagon-like peptide 1 receptor agonist, was quickly adopted by clinicians following its approval by the European Medicines Agency in 2009 and by the U.S. Food and Drug Administration in 2010. Approval was based on a number of phase III RCTs called the Liraglutide Effect and Action in Diabetes (LEAD) 1–5 trials (2).

We used data from Danish population-based medical databases to examine whether routine clinical care liraglutide initiators would have been eligible for participation in the phase III trials. Furthermore, their HbA<sub>1c</sub> reduction on

liraglutide was evaluated. We included all individuals who lived in northern Denmark and redeemed a first-time liraglutide prescription from 2009–2015 ( $n = 9,251$ ). We adapted each LEAD 1–5 trial eligibility criterion (such as age, comorbid conditions, current drug use, HbA<sub>1c</sub> level, etc.) to the Danish National Patient Registry, the Danish Prescription Registry, and the clinical laboratory information system, as appropriate (Table 1) (3). Exclusion criteria were largely similar in the LEAD 1–5 trials, and we used only exclusion criteria that were shared in all five trials. When exact information was unavailable in our databases (i.e., BMI and blood pressure), we assumed that patients would be eligible for trial participation.

Routine clinical care liraglutide users frequently had comorbidities that would have made them ineligible for the LEAD 1–5 trials, including “clinically significant cardiovascular disease” (29%) or “other significant disease” (11%) (Table 1). Further, 27% had HbA<sub>1c</sub> levels outside the values needed for inclusion in the LEAD 1–5 trials, and 37% were on current insulin, another exclusion criterion in the LEAD 1–5 trials. Overall, 73% of all real-world liraglutide users would have been ineligible for any of the LEAD trials (Table 1). Approved indications expanded

during 2009–2015 allowing for liraglutide therapy together with other glucose-lowering drug regimens (e.g., with insulin or as monotherapy) and a beneficial liraglutide effect in patients with cardiovascular disease emerged shortly after our study period (4). When we disregarded both previous glucose-lowering drug use and pre-existing cardiovascular disease as exclusion criteria, we found that 45% of real-world users would have been ineligible for RCT participation.

Overall, patients ineligible for LEAD 1–5 participation had a higher HbA<sub>1c</sub> before initiating liraglutide (8.7% [72 mmol/mol]) than eligible patients (8.4% [68 mmol/mol]) (Table 1) but experienced similar HbA<sub>1c</sub> reductions after 6 months (−1.0% [−11 mmol/mol] vs. −0.9% [−10 mmol/mol]).

We found that liraglutide users treated in clinical care settings in northern Denmark did not resemble patients included in the LEAD 1–5 trials, with almost three out of four routine clinical care initiators being classified as ineligible for the RCTs. Nevertheless, our findings suggest that the efficacy of liraglutide on HbA<sub>1c</sub> seen in the LEAD trials translates into real-world effectiveness, both for eligible and noneligible patients. The LEAD 1–5 trials thus found similar reductions in HbA<sub>1c</sub>

<sup>1</sup>Department of Clinical Epidemiology, Aarhus University Hospital, Aarhus, Denmark

<sup>2</sup>Clinical Pharmacology and Pharmacy, University of Southern Denmark, Odense, Denmark

<sup>3</sup>Clinical Metabolic Physiology, Steno Diabetes Center Copenhagen, University of Copenhagen, Gentofte, Denmark

<sup>4</sup>Department of Clinical Medicine, Faculty of Health and Medical Sciences, University of Copenhagen, Copenhagen, Denmark

Corresponding author: Jakob Schöllhammer Knudsen, [jsk@clin.au.dk](mailto:jsk@clin.au.dk).

Received 7 May 2018 and accepted 5 June 2018.

© 2018 by the American Diabetes Association. Readers may use this article as long as the work is properly cited, the use is educational and not for profit, and the work is not altered. More information is available at <http://www.diabetesjournals.org/content/license>.

**Table 1—Real-world liraglutide initiators that would have been excluded from participation in the LEAD 1–5 trials and their HbA<sub>1c</sub> reduction**

| Exclusion criteria for participation in LEAD 1–5 trials | Real-world patients that would have been excluded based on each criterion |      |  | Mean (95% CI) HbA <sub>1c</sub> before liraglutide initiation |             |          | Mean (95% CI) HbA <sub>1c</sub> 6 months after liraglutide initiation |              |          | Mean (95% CI) HbA <sub>1c</sub> reduction |                 |          |
|---------------------------------------------------------|---------------------------------------------------------------------------|------|--|---------------------------------------------------------------|-------------|----------|-----------------------------------------------------------------------|--------------|----------|-------------------------------------------|-----------------|----------|
|                                                         | n                                                                         | %    |  | %                                                             | mmol/mol    | (95% CI) | %                                                                     | mmol/mol     | (95% CI) | %                                         | mmol/mol        | (95% CI) |
| All patients                                            | 9,251                                                                     | 100  |  | 8.6 (8.6, 8.6)                                                | 70 (70, 70) |          | 7.6 (7.6, 7.7)                                                        | 60 (60, 61)  |          | -1.0 (-1.0, -0.9)                         | -11 (-11, -10)  |          |
| Excluded for any of the following                       | 6,768                                                                     | 73.2 |  | 8.7 (8.7, 8.7)                                                | 72 (72, 72) |          | 7.7 (7.7, 7.7)                                                        | 61 (61, 61)  |          | -1.0 (-1.0, -0.9)                         | -11 (-11, -10)  |          |
| Not excluded for any of the following                   | 2,583                                                                     | 26.9 |  | 8.4 (8.3, 8.4)                                                | 68 (67, 68) |          | 7.5 (7.4, 7.5)                                                        | 58 (57, 58)  |          | -0.9 (-1.0, -0.9)                         | -10 (-11, -10)  |          |
| Ongoing noninsulin GLD therapy for <3 months            | 1,051                                                                     | 11.4 |  | 8.8 (8.7, 8.9)                                                | 73 (73, 74) |          | 7.7 (7.6, 7.8)                                                        | 61 (60, 62)  |          | -1.1 (-1.2, -1.0)                         | -12 (-13, -11)  |          |
| HbA <sub>1c</sub> level outside range*                  | 2,522                                                                     | 27.3 |  | 9.1 (9.0, 9.2)                                                | 76 (75, 77) |          | 7.8 (7.7, 7.9)                                                        | 62 (61, 63)  |          | -1.3 (-1.4, -1.2)                         | -14 (-16, -13)  |          |
| Age <18 years                                           | 8                                                                         | 0.1  |  | 8.6 (6.0, 11.1)                                               | 70 (42, 98) |          | 6.7 (-1.0, 14.4)                                                      | 50 (<0, 134) |          | -2.5 (-16.3, 11.3)                        | -28 (-155, 100) |          |
| Age >80 years                                           | 147                                                                       | 1.6  |  | 8.5 (8.2, 8.7)                                                | 69 (66, 72) |          | 7.6 (7.4, 7.8)                                                        | 60 (57, 62)  |          | -0.9 (-1.1, -0.6)                         | -10 (-12, -7)   |          |
| Current insulin treatment                               | 3,414                                                                     | 36.9 |  | 8.8 (8.7, 8.8)                                                | 73 (72, 73) |          | 8.00 (7.9, 8.0)                                                       | 64 (63, 64)  |          | -0.8 (-0.8, -0.7)                         | -9 (-9, -8)     |          |
| Impaired liver function                                 | 86                                                                        | 0.9  |  | 9.2 (8.8, 9.6)                                                | 77 (73, 81) |          | 7.7 (7.3, 8.0)                                                        | 61 (56, 64)  |          | -1.7 (-2.1, -1.2)                         | -19 (-23, -13)  |          |
| Hepatitis B or C positive                               | 27                                                                        | 0.3  |  | 9.1 (8.5, 9.7)                                                | 76 (69, 82) |          | 8.5 (7.6, 9.3)                                                        | 69 (60, 78)  |          | -0.6 (-1.3, 0.1)                          | -7 (-14, 1)     |          |
| Impaired renal function                                 | 395                                                                       | 4.3  |  | 8.6 (8.5, 8.8)                                                | 70 (69, 74) |          | 7.7 (7.6, 7.8)                                                        | 61 (60, 62)  |          | -0.9 (-1.0, -0.7)                         | -10 (-11, -8)   |          |
| Clinically significant active CVD                       | 2,646                                                                     | 28.6 |  | 8.7 (8.6, 8.7)                                                | 72 (70, 72) |          | 7.7 (7.7, 7.8)                                                        | 61 (61, 62)  |          | -0.9 (-1.0, -0.9)                         | -10 (-11, -10)  |          |
| Cancer                                                  | 326                                                                       | 3.5  |  | 8.5 (8.4, 8.7)                                                | 69 (68, 72) |          | 7.6 (7.5, 7.8)                                                        | 60 (58, 62)  |          | -0.9 (-1.1, -0.8)                         | -10 (-12, -10)  |          |
| Clinically significant disease                          | 1,029                                                                     | 11.2 |  | 8.6 (8.4, 8.6)                                                | 70 (68, 70) |          | 7.6 (7.5, 7.7)                                                        | 60 (58, 61)  |          | -1.0 (-1.1, -1.0)                         | -11 (-12, -11)  |          |
| Recurrent hypoglycemia                                  | 46                                                                        | 0.5  |  | 8.5 (8.0, 9.0)                                                | 69 (64, 75) |          | 8.1 (7.7, 8.5)                                                        | 65 (61, 69)  |          | -0.5 (-0.9, 0.0)                          | -6 (-10, 0)     |          |
| Use of drugs that interfere with glucose                | 439                                                                       | 4.8  |  | 8.6 (8.4, 8.7)                                                | 70 (68, 72) |          | 7.5 (7.4, 7.6)                                                        | 58 (57, 60)  |          | -1.0 (-1.2, -0.9)                         | -11 (-13, -10)  |          |
| Alcohol or substance abuse                              | 389                                                                       | 4.2  |  | 8.9 (8.6, 9.1)                                                | 74 (70, 76) |          | 7.8 (7.6, 7.9)                                                        | 62 (60, 63)  |          | -1.1 (-1.3, -0.9)                         | -12 (-14, -10)  |          |
| Mental incapacity                                       | 246                                                                       | 2.6  |  | 8.9 (8.6, 9.1)                                                | 74 (70, 76) |          | 7.8 (7.5, 8.0)                                                        | 62 (58, 64)  |          | -1.1 (-1.4, -0.9)                         | -12 (-14, -10)  |          |
| Current/intention of breastfeeding or pregnant          | 25                                                                        | 0.3  |  | 7.8 (7.1, 8.5)                                                | 62 (54, 69) |          | 7.1 (6.5, 7.7)                                                        | 54 (48, 61)  |          | -0.9 (-1.5, 0.2)                          | -10 (-17, 2)    |          |

Among 9,251 real-world initiators of liraglutide in northern Denmark. Exclusion criteria as present in all LEAD 1–5 studies. CVD, cardiovascular disease; GLD, glucose-lowering drugs. \*Last measured HbA<sub>1c</sub> outside 7–11% (53–97 mmol/mol)/7–11% (53–97 mmol/mol)/7–10% (53–86 mmol/mol) range among patients receiving no/monotherapy/combination noninsulin glucose-lowering drug prescriptions before liraglutide initiation.

after 6 months (12 months in LEAD 3): between  $-0.8\%$  ( $-9$  mmol/mol) (LEAD 3) and  $-1.5\%$  ( $-17$  mmol/mol) (LEAD 4). However, our findings also underscore the importance of postmarketing observational studies based on real-world data. Although subsequent RCTs and the current study have established the efficacy of liraglutide in patients ineligible for the LEAD 1–5 trials, safety data are needed for patients with common comorbidities.

**Funding.** Aarhus University funded the study.

**Duality of Interest.** A.P. has received funding from Novo Nordisk for unrelated projects, with funding paid to his institution (no personal fees).

F.K.K. has served on scientific advisory panels and/or been part of speakers' bureaus for, served as a consultant to, and/or received research support from Amgen, AstraZeneca, Boehringer Ingelheim, Eli Lilly, Gubra, MedImmune, Merck Sharp & Dohme/Merck, Norgine, Novo Nordisk, Sanofi, and Zealand Pharma. None of the authors received support from any organization for the submitted work. No other potential conflicts of interest relevant to this article were reported.

**Author Contributions.** J.S.K., R.W.T., A.P., and F.K.K. designed the study. J.S.K. reviewed the literature. J.S.K., R.W.T., A.P., and H.T.S. directed the analyses. All authors participated in the discussion and interpretation of the results. J.S.K. organized the writing and wrote the initial draft. All authors critically revised the manuscript for intellectual content and approved the final version. R.W.T. is the guarantor of this work and, as such, had full access to all of the data in the

study and takes responsibility for the integrity of the data and the accuracy of the data analysis.

## References

1. Sørensen HT, Lash TL, Rothman KJ. Beyond randomized controlled trials: a critical comparison of trials with nonrandomized studies. *Hepatology* 2006;44:1075–1082
2. Bode BW. Design, findings and implications of the liraglutide Phase III clinical trial program. *Clin Investig (Lond)* 2012;2:59–72
3. Pottegård A, Schmidt SAJ, Wallach-Kildemoes H, Sørensen HT, Hallas J, Schmidt M. Data resource profile: the Danish National Prescription Registry. *Int J Epidemiol* 2017;46:798–798f
4. Marso SP, Daniels GH, Brown-Frandsen K, et al.; LEADER Steering Committee; LEADER Trial Investigators. Liraglutide and cardiovascular outcomes in type 2 diabetes. *N Engl J Med* 2016;375:311–322
